# Supplementary material for: The Architecture of Parent-of-Origin Effects in Mice
Source: PubMed Central journal article supplement (PMC3898482; doi:10.1016/j.cell.2013.11.043), 2014-01-16
Supplement: mmc1.pdf [file mmc1.pdf]

Table S1. Estimates of Heritability, Related to Figure 1

| Trait                            | $h_+^2$ | $h_-^2$ | $\Delta(h_+^2)$ | $\Delta(h_-^2)$ | $N$  |
|----------------------------------|---------|---------|-----------------|-----------------|------|
| AUC.IRI.AUC.G                    | 0.33    | 0.18    | 0.06            | 0.08            | 938  |
| AdrenalMeanWeight                | 0.31    | 0.22    | 0.04            | 0.06            | 1322 |
| Biochem.ALP                      | 0.47    | 0.36    | 0.03            | 0.04            | 1260 |
| Biochem.ALT                      | 0.38    | 0.00    | 0.07            | 0.11            | 1190 |
| Biochem.AST                      | 0.40    | 0.00    | 0.08            | 0.11            | 1224 |
| Biochem.Albumin                  | 0.34    | 0.12    | 0.07            | 0.09            | 1243 |
| Biochem.Calcium                  | 0.64    | 0.00    | 0.08            | 0.11            | 1253 |
| Biochem.Chloride                 | 0.63    | 0.00    | 0.08            | 0.11            | 1292 |
| Biochem.Creatinine               | 0.28    | 0.00    | 0.07            | 0.11            | 1295 |
| Biochem.HDL                      | 0.49    | 0.32    | 0.04            | 0.05            | 1186 |
| Biochem.LDL                      | 0.40    | 0.23    | 0.05            | 0.07            | 1226 |
| Biochem.Phosphorous              | 0.38    | 0.06    | 0.08            | 0.11            | 1105 |
| Biochem.Sodium                   | 0.58    | 0.00    | 0.08            | 0.11            | 1282 |
| Biochem.Tot.Cholesterol          | 0.32    | 0.32    | 0.04            | 0.04            | 1259 |
| Biochem.Tot.Protein              | 0.36    | 0.00    | 0.08            | 0.11            | 1157 |
| Biochem.Triglycerides            | 0.43    | 0.06    | 0.08            | 0.11            | 1092 |
| Biochem.Urea                     | 0.51    | 0.00    | 0.08            | 0.11            | 1248 |
| BurrowedPelletWeight             | 0.27    | 0.31    | 0.03            | 0.04            | 1351 |
| Context.Mean.Freeze              | 0.42    | 0.18    | 0.07            | 0.08            | 1024 |
| Cue.Boli                         | 0.21    | 0.00    | 0.07            | 0.11            | 1072 |
| Cue.Mean.Freeze.Corrected.During | 0.40    | 0.05    | 0.09            | 0.12            | 1008 |
| Cue.Mean.Freeze.Post             | 0.15    | 0.19    | 0.05            | 0.08            | 1008 |
| DIRI.DG                          | 0.36    | 0.17    | 0.06            | 0.08            | 939  |
| EMO                              | 0.27    | 0.33    | 0.03            | 0.04            | 1342 |

|                       |      |      |      |      |      |
|-----------------------|------|------|------|------|------|
| EPM.ClosedArmDistance | 0.38 | 0.10 | 0.06 | 0.09 | 1298 |
| EPM.ClosedArmTime     | 0.31 | 0.27 | 0.04 | 0.05 | 1297 |
| EPM.OpenArmDistance   | 0.40 | 0.21 | 0.05 | 0.07 | 1323 |
| EPM.OpenArmEntries    | 0.37 | 0.21 | 0.05 | 0.07 | 1323 |
| EPM.OpenArmLatency    | 0.26 | 0.29 | 0.04 | 0.04 | 1323 |
| EPM.OpenArmTime       | 0.39 | 0.19 | 0.05 | 0.07 | 1323 |
| EarHoleMeanArea       | 0.47 | 0.24 | 0.05 | 0.06 | 1297 |
| End.Weight            | 0.52 | 0.23 | 0.05 | 0.06 | 1351 |
| FN.Latency            | 0.28 | 0.16 | 0.05 | 0.07 | 1324 |
| FN.preWeight          | 0.63 | 0.10 | 0.07 | 0.09 | 1358 |
| FPS.Bang.Increase     | 0.17 | 0.08 | 0.06 | 0.08 | 1192 |
| FPS.Pre.Bang.Mean     | 0.46 | 0.19 | 0.06 | 0.08 | 1192 |
| Glucose.AUC           | 0.34 | 0.20 | 0.06 | 0.08 | 984  |
| Glucose.Delta         | 0.33 | 0.20 | 0.06 | 0.08 | 985  |
| Glucose_0             | 0.33 | 0.00 | 0.06 | 0.10 | 1300 |
| Glucose_15            | 0.34 | 0.00 | 0.07 | 0.11 | 1289 |
| Glucose_30            | 0.40 | 0.05 | 0.08 | 0.11 | 1284 |
| Glucose_75            | 0.29 | 0.21 | 0.04 | 0.06 | 1264 |
| Haem.BASabs           | 0.27 | 0.00 | 0.08 | 0.11 | 1167 |
| Haem.HCT              | 0.25 | 0.07 | 0.07 | 0.10 | 1166 |
| Haem.HGB              | 0.28 | 0.18 | 0.05 | 0.08 | 1164 |
| Haem.LYMabs           | 0.41 | 0.13 | 0.06 | 0.09 | 1141 |
| Haem.MCH              | 0.55 | 0.32 | 0.04 | 0.04 | 1163 |
| Haem.MCHC             | 0.65 | 0.00 | 0.09 | 0.11 | 1159 |
| Haem.MCV              | 0.50 | 0.33 | 0.04 | 0.04 | 1174 |
| Haem.MONabs           | 0.26 | 0.00 | 0.07 | 0.11 | 1167 |
| Haem.MPV              | 0.34 | 0.28 | 0.05 | 0.06 | 1167 |

|                      |      |      |      |      |      |
|----------------------|------|------|------|------|------|
| Haem.NEUabs          | 0.42 | 0.20 | 0.06 | 0.08 | 1167 |
| Haem.PCT             | 0.25 | 0.20 | 0.05 | 0.07 | 1137 |
| Haem.PLT             | 0.31 | 0.17 | 0.06 | 0.08 | 1158 |
| Haem.RBC             | 0.31 | 0.07 | 0.07 | 0.11 | 1163 |
| Haem.RDW             | 0.41 | 0.32 | 0.04 | 0.05 | 1156 |
| Haem.WBC             | 0.39 | 0.17 | 0.05 | 0.08 | 1167 |
| Imm.CD4CD8Ratio      | 0.58 | 0.30 | 0.05 | 0.05 | 1007 |
| Imm.CD4inCD3XGeoMean | 0.57 | 0.18 | 0.06 | 0.08 | 1009 |
| Imm.CD8inCD3YGeoMean | 0.66 | 0.00 | 0.10 | 0.13 | 1006 |
| Imm.PctB220          | 0.57 | 0.19 | 0.06 | 0.08 | 1012 |
| Imm.PctCD3           | 0.45 | 0.29 | 0.05 | 0.06 | 1010 |
| Imm.PctCD4           | 0.46 | 0.20 | 0.06 | 0.08 | 1009 |
| Imm.PctCD4inCD3      | 0.55 | 0.30 | 0.05 | 0.05 | 1009 |
| Imm.PctCD8           | 0.55 | 0.33 | 0.04 | 0.04 | 1011 |
| Imm.PctNKAndOutliers | 0.44 | 0.00 | 0.08 | 0.13 | 1003 |
| Insulin.0            | 0.36 | 0.00 | 0.08 | 0.12 | 1037 |
| Insulin.15           | 0.32 | 0.24 | 0.05 | 0.06 | 1027 |
| Insulin.30           | 0.32 | 0.22 | 0.06 | 0.07 | 1021 |
| Insulin.75           | 0.43 | 0.01 | 0.09 | 0.13 | 999  |
| Insulin.AUC          | 0.32 | 0.18 | 0.06 | 0.08 | 994  |
| Insulin.Delta        | 0.33 | 0.20 | 0.06 | 0.08 | 996  |
| OFT.CenterTime       | 0.31 | 0.22 | 0.05 | 0.06 | 1346 |
| OFT.Latency          | 0.27 | 0.24 | 0.04 | 0.05 | 1346 |
| OFT.TotalActivity    | 0.32 | 0.34 | 0.03 | 0.04 | 1344 |
| Obesity.BMI          | 0.21 | 0.12 | 0.05 | 0.08 | 1315 |
| Obesity.BodyLength   | 0.25 | 0.14 | 0.05 | 0.08 | 1328 |
| PAS.Ambulatory1      | 0.38 | 0.13 | 0.06 | 0.08 | 1337 |

|                            |      |      |      |      |      |
|----------------------------|------|------|------|------|------|
| PAS.Ambulatory6            | 0.33 | 0.13 | 0.06 | 0.08 | 1327 |
| PAS.TotalAmbulatory        | 0.45 | 0.18 | 0.06 | 0.07 | 1336 |
| PAS.TotalFine              | 0.32 | 0.23 | 0.04 | 0.06 | 1340 |
| Pleth.EnhancedDiff         | 0.34 | 0.30 | 0.04 | 0.05 | 1136 |
| Pleth.Weight               | 0.59 | 0.17 | 0.06 | 0.08 | 1314 |
| Pleth.base.BreathFrequency | 0.36 | 0.12 | 0.06 | 0.08 | 1268 |
| Pleth.base.EnhancedPause   | 0.41 | 0.00 | 0.07 | 0.10 | 1271 |
| Pleth.base.ExpiratoryTime  | 0.32 | 0.11 | 0.06 | 0.08 | 1265 |
| Pleth.base.InspiratoryTime | 0.38 | 0.13 | 0.06 | 0.08 | 1273 |
| Pleth.base.MinuteVolume    | 0.29 | 0.16 | 0.05 | 0.07 | 1263 |
| Pleth.base.TidalVolume     | 0.36 | 0.10 | 0.06 | 0.09 | 1258 |
| Pleth.meta.BreathFrequency | 0.32 | 0.24 | 0.05 | 0.06 | 1137 |
| Pleth.meta.EnhancedPause   | 0.35 | 0.31 | 0.04 | 0.05 | 1145 |
| Pleth.meta.ExpiratoryTime  | 0.33 | 0.20 | 0.05 | 0.07 | 1141 |
| Pleth.meta.InspiratoryTime | 0.41 | 0.28 | 0.04 | 0.05 | 1148 |
| Pleth.meta.MinuteVolume    | 0.29 | 0.26 | 0.05 | 0.06 | 1139 |
| Pleth.meta.TidalVolume     | 0.39 | 0.25 | 0.05 | 0.07 | 1138 |
| Start.Weight               | 0.65 | 0.05 | 0.08 | 0.10 | 1378 |
| Weight.GrowthSlope         | 0.33 | 0.23 | 0.04 | 0.06 | 1371 |

Shown are estimates for 97 traits measured in HS mice, attributed to allele sharing via a parent of the same sex  $h_{\pm}^2$  and via parents of the opposite sex,  $h_{\mp}^2$ .  $\Delta(h_{\pm}^2)$ ,  $\Delta(h_{\mp}^2)$  are the estimated standard errors. Heritabilities were estimated by GCTA (Yang, Lee, Goddard, & Visscher, 2011).  $N$  is the number of phenotyped mice.

Table S3. Analysis of Variance of Growth in *Man1a2* Mice, Related to Figure 3

| Model                                 | Chisq        | Df       | Pval                         | Description                                                       |
|---------------------------------------|--------------|----------|------------------------------|-------------------------------------------------------------------|
| $a + a^2$                             |              |          |                              | quadratic dependence of weight on age                             |
| $a + a^2 + s$                         | 163.8        | 1        | $10^{-37}$                   | age-independent sex difference                                    |
| $(a + a^2)*s$                         | 624.2        | 2        | $10^{-136}$                  | age-dependent on sex difference                                   |
| <b><math>(a + a^2)*(s+p)</math></b>   | <b>110.6</b> | <b>3</b> | <b><math>10^{-24}</math></b> | <b>parental genotype effect independent of offspring genotype</b> |
| $(a + a^2)*(s+p+g)$                   | 5.0          | 3        | 0.169                        | genotype of offspring independent of parental genotype            |
| <b><math>(a + a^2)*(s+p*g)</math></b> | <b>17.2</b>  | <b>3</b> | <b>0.00062</b>               | <b>interaction between parental and offspring genotype (POE)</b>  |
| $(a + a^2)*(s*p + p*g)$               | 14.3         | 3        | 0.00243                      | sex-specific parental effect                                      |
| $(a + a^2)*(s*p*g)$                   | 3.4136       | 6        | 0.75542                      | sex-specific parental and POE effects                             |

A series of nested linear mixed models of increasing complexity were fitted to weights of 108 offspring from a reciprocal cross of the *Man1a2* knockout. A total of 855 weight measurements were taken at ages between 4 and 11 weeks. Each line describes the fit of a model that also included a random effect for each mouse in addition to the fixed effects described in the Model column. Here a: age in weeks, s: sex, p: parental genotype (either maternal KO or maternal WT), g: offspring genotype (KO or WT). Models with an \* contain interaction terms. Each model is nested inside all the models beneath it. Chisq is the chi-squared statistic for the additional fit of the model compared to the model on the line immediately above. Df is the degrees of freedom (number of additional parameters) in the test of the model, and Pval is the p-value of the test of the null hypothesis that the model explains no more variation than the nested model above it. Description is a verbal explanation of the model. The Model "interaction between parental and offspring genotype (POE)" highlighted in bold corresponds to the curves in Figure 3.

Table S5. Analysis of Variance for *H2-ab1* Reciprocal Crosses, Related to Figure 4

| <b>(a) CD4<sup>+</sup> homozygous</b> | <b>Df</b> | <b>Sum Sq</b> | <b>P-value</b> |
|---------------------------------------|-----------|---------------|----------------|
| s                                     | 1         | 140.73        | <b>0.0009</b>  |
| p                                     | 1         | 97.32         | <b>0.005</b>   |
| s*p                                   | 1         | 16.72         | 0.21           |
| Residuals                             | 34        | 360.2         |                |
| Total                                 | 37        | 614.97        |                |

  

| <b>(b) CD4<sup>+</sup> heterozygous</b> | <b>Df</b> | <b>Sum Sq</b> | <b>P-value</b> |
|-----------------------------------------|-----------|---------------|----------------|
| s                                       | 1         | 69.94         | <b>0.006</b>   |
| g                                       | 1         | 690.67        | <b>7E-13</b>   |
| p                                       | 1         | 2.66          | 0.58           |
| s*g                                     | 1         | 1.61          | 0.66           |
| s*p                                     | 1         | 10.19         | 0.28           |
| g*p                                     | 1         | 49.45         | <b>0.020</b>   |
| s*g*p                                   | 1         | 11.78         | 0.25           |
| Residuals                               | 65        | 565.39        |                |
| Total                                   | 72        | 1401.69       |                |

  

| <b>(c) DCX heterozygous</b> | <b>Df</b> | <b>Sum Sq</b> | <b>P-value</b> |
|-----------------------------|-----------|---------------|----------------|
| s                           | 1         | 997           | 0.35           |
| g                           | 1         | 2698          | 0.13           |
| p                           | 1         | 603           | 0.46           |
| s*g                         | 1         | 103           | 0.76           |
| s*p                         | 1         | 2963          | 0.11           |
| g*p                         | 1         | 1313          | 0.28           |
| s*g*p                       | 1         | 6818          | <b>0.020</b>   |
| Residuals                   | 22        | 24167         |                |
| Total                       | 29        | 39662         |                |

(a) CD4<sup>+</sup> cells (blood), homozygous cross. (b) CD4<sup>+</sup> cells (spleen), heterozygous cross (c) Adult neurogenesis (DCX), heterozygous cross. s, g are sex and *H2-ab1* genotype of F1 mice; p is the parental *H2-ab1* genotype (maternal vs paternal KO). Shown are the variation (Sum Sq) of each effect and their interactions; p: parental effect (difference between a mother or father carrying the *H2-ab1* KO), g: effect of the *H2-ab1* KO in the F1, g\*p: parent of origin effect, s\*g\*p: sex-dependent parent of origin effect. In (a) all F1 mice are heterozygous. P-values are from F-tests; those <0.05 are in bold.

Table S7. Known Imprinted Genes Differentially Expressed in the *H2-ab1* Reciprocal Cross, Related to Figure 4E

| tissue | sex | type | gene       | pat  | mat   | Fold Change | FDR      |
|--------|-----|------|------------|------|-------|-------------|----------|
| L      | F   | Het  | Bcl2l1     | 1300 | 746   | 0.57        | 4.49E-03 |
| L      | M   | Het  | H19        | 41   | 9     | 0.22        | 3.44E-03 |
| L      | F   | Wt   | Mkcn1-ps1* | 8    | 35    | 4.44        | 4.98E-07 |
| L      | F   | Wt   | Bcl2l1     | 1081 | 669   | 0.62        | 5.15E-03 |
| L      | M   | Wt   | H19        | 2    | 42    | 15.75       | 1.56E-08 |
| L      | M   | Wt   | Dcn        | 489  | 796   | 1.63        | 4.06E-02 |
| H      | F   | Het  | Igf2       | 736  | 263   | 0.36        | 2.93E-18 |
| H      | F   | Het  | Dlk1       | 71   | 30    | 0.42        | 5.14E-04 |
| H      | F   | Het  | Cdkn1c     | 64   | 32    | 0.51        | 2.71E-02 |
| H      | M   | Het  | Xlr3b      | 1    | 15    | 11.23       | 7.77E-03 |
| H      | M   | Het  | Meg3       | 5734 | 9441  | 1.65        | 8.44E-03 |
| H      | F   | Wt   | Dlk1       | 58   | 26    | 0.45        | 8.11E-03 |
| H      | M   | Wt   | Dcn        | 264  | 119   | 0.45        | 7.35E-05 |
| H      | M   | Wt   | Dio3       | 87   | 31    | 0.37        | 1.68E-03 |
| H      | M   | Wt   | Meg3       | 8489 | 12307 | 1.45        | 3.99E-02 |
| H      | M   | Wt   | Plagl1     | 180  | 72    | 0.40        | 6.28E-03 |
| H      | M   | Wt   | Mirg       | 71   | 141   | 1.98        | 4.90E-03 |

Genes are categorized by tissue (L, lung; H, hippocampus), sex (M, male; F, female) and type (whether the F1 mouse was wild-type or heterozygous for the KO). Shown are the mean expression levels in animals with paternal (pat) or maternal (mat) KO (based on three or four biological replicates), the fold-change in expression, log<sub>2</sub> fold-change and FDR of the difference, as computed by DESeq (Anders & Huber, 2010). Note that the imprinted status of *Mkcn1-ps1\** is disputed (Gray, Wilson, Fortin, & Nicholls, 2006; Hirotsune et al., 2003).

Table S8. Counts of Differentially Expressed Genes in Common between Experimental Conditions in the Heterozygous *H2-ab1* Reciprocal Cross, for (a) Lung and (b) Hippocampus, Related to Figure 5E

**(a) lung**

|              | <b>Het.F</b> | <b>Het.M</b> | <b>WT.F</b> | <b>WT.M</b> |
|--------------|--------------|--------------|-------------|-------------|
| <b>Het.F</b> | 164          | 1            | 32          | 33          |
| <b>Het.M</b> | -2           | 54           | 10          | 13          |
| <b>WT.F</b>  | -50          | -8           | 1210        | 219         |
| <b>WT.M</b>  | -49          | -15          | -200        | 616         |

**(b) hippocampus**

|              | <b>Het.F</b> | <b>Het.M</b> | <b>WT.F</b> | <b>WT.M</b> |
|--------------|--------------|--------------|-------------|-------------|
| <b>Het.F</b> | 124          | 4            | 6           | 7           |
| <b>Het.M</b> | -3           | 26           | 3           | 3           |
| <b>WT.F</b>  | -3           | 0            | 74          | 11          |
| <b>WT.M</b>  | -1           | 0            | -5          | 97          |

The negative counts in the lower triangle of each table are for genes in common but differentially expressed in opposite directions (the direction of expression is the sign of the difference between mice whose father was KO and mice whose mother was KO). The positive counts in the upper triangles are numbers in common and differentially expressed in the same direction.
